# Supplementary material for: Reliable Detection of Herpes Simplex Virus Sequence Variation by High-Throughput Resequencing
Source: Viruses. 2017 Aug 16;9(8):226. doi: 10.3390/v9080226 (PMC5580483; doi:10.3390/v9080226)
Supplement: Supplementary file 1 [file viruses-09-00226-s001.tgz]

Archive with 6 entries (5 files):
- Supplementary_Data_File
- Supplementary_Data_File/SNV_only_deltaCTRL2_freebayes_clean_distinct_2_NR.recode.vcf
- Supplementary_Data_File/SNV_only_17p_freebayes_clean_distinct_2_NR.recode.vcf
- Supplementary_Data_File/SNV_only_deltaCTRL2_freebayes_clean_distinct_2_notNR.recode.vcf
- Supplementary_Data_File/SNV_only_17p_freebayes_clean_distinct_2_notNR.recode.vcf
- Supplementary_Data_File/ReadMe_contents_of_Supplementary_Data_File.docx
