# Supplementary material for: Reliable Detection of Herpes Simplex Virus Sequence Variation by High-Throughput Resequencing
Source: Viruses. 2017 Aug 16;9(8):226. doi: 10.3390/v9080226 (PMC5580483; doi:10.3390/v9080226)
Supplement: Supplementary file 1 [file viruses-09-00226-s001.tgz › Supplementary_Data_File/SNV_only_deltaCTRL2_freebayes_clean_distinct_2_notNR.recode.vcf]

##fileformat=VCFv4.1
##fileDate=20160208
##source=freeBayes v0.9.15-1-g076a2a2-dirty
##reference=/scratch/lfs/mcintyre/references/hsv1/hsv1.fa
##phasing=none
##commandline="freebayes -f /scratch/lfs/mcintyre/references/hsv1/hsv1.fa /scratch/lfs/mcintyre/bloom_dna/deltaCTRL2_clean_distinct_2_notNR/bwa_parse/bam/deltaCTRL2_clean_2_notNR_bwa_aln_PE.sorted.bam"
##filter="QUAL > 20"
##INFO=<ID=NS,Number=1,Type=Integer,Description="Number of samples with data">
##INFO=<ID=DP,Number=1,Type=Integer,Description="Total read depth at the locus">
##INFO=<ID=DPB,Number=1,Type=Float,Description="Total read depth per bp at the locus; bases in reads overlapping / bases in haplotype">
##INFO=<ID=AC,Number=A,Type=Integer,Description="Total number of alternate alleles in called genotypes">
##INFO=<ID=AN,Number=1,Type=Integer,Description="Total number of alleles in called genotypes">
##INFO=<ID=AF,Number=A,Type=Float,Description="Estimated allele frequency in the range (0,1]">
##INFO=<ID=RO,Number=1,Type=Integer,Description="Reference allele observation count, with partial observations recorded fractionally">
##INFO=<ID=AO,Number=A,Type=Integer,Description="Alternate allele observations, with partial observations recorded fractionally">
##INFO=<ID=PRO,Number=1,Type=Float,Description="Reference allele observation count, with partial observations recorded fractionally">
##INFO=<ID=PAO,Number=A,Type=Float,Description="Alternate allele observations, with partial observations recorded fractionally">
##INFO=<ID=QR,Number=1,Type=Integer,Description="Reference allele quality sum in phred">
##INFO=<ID=QA,Number=A,Type=Integer,Description="Alternate allele quality sum in phred">
##INFO=<ID=PQR,Number=1,Type=Float,Description="Reference allele quality sum in phred for partial observations">
##INFO=<ID=PQA,Number=A,Type=Float,Description="Alternate allele quality sum in phred for partial observations">
##INFO=<ID=SRF,Number=1,Type=Integer,Description="Number of reference observations on the forward strand">
##INFO=<ID=SRR,Number=1,Type=Integer,Description="Number of reference observations on the reverse strand">
##INFO=<ID=SAF,Number=A,Type=Integer,Description="Number of alternate observations on the forward strand">
##INFO=<ID=SAR,Number=A,Type=Integer,Description="Number of alternate observations on the reverse strand">
##INFO=<ID=SRP,Number=1,Type=Float,Description="Strand balance probability for the reference allele: Phred-scaled upper-bounds estimate of the probability of observing the deviation between SRF and SRR given E(SRF/SRR) ~ 0.5, derived using Hoeffding's inequality">
##INFO=<ID=SAP,Number=A,Type=Float,Description="Strand balance probability for the alternate allele: Phred-scaled upper-bounds estimate of the probability of observing the deviation between SAF and SAR given E(SAF/SAR) ~ 0.5, derived using Hoeffding's inequality">
##INFO=<ID=AB,Number=A,Type=Float,Description="Allele balance at heterozygous sites: a number between 0 and 1 representing the ratio of reads showing the reference allele to all reads, considering only reads from individuals called as heterozygous">
##INFO=<ID=ABP,Number=A,Type=Float,Description="Allele balance probability at heterozygous sites: Phred-scaled upper-bounds estimate of the probability of observing the deviation between ABR and ABA given E(ABR/ABA) ~ 0.5, derived using Hoeffding's inequality">
##INFO=<ID=RUN,Number=A,Type=Integer,Description="Run length: the number of consecutive repeats of the alternate allele in the reference genome">
##INFO=<ID=RPP,Number=A,Type=Float,Description="Read Placement Probability: Phred-scaled upper-bounds estimate of the probability of observing the deviation between RPL and RPR given E(RPL/RPR) ~ 0.5, derived using Hoeffding's inequality">
##INFO=<ID=RPPR,Number=1,Type=Float,Description="Read Placement Probability for reference observations: Phred-scaled upper-bounds estimate of the probability of observing the deviation between RPL and RPR given E(RPL/RPR) ~ 0.5, derived using Hoeffding's inequality">
##INFO=<ID=EPP,Number=A,Type=Float,Description="End Placement Probability: Phred-scaled upper-bounds estimate of the probability of observing the deviation between EL and ER given E(EL/ER) ~ 0.5, derived using Hoeffding's inequality">
##INFO=<ID=EPPR,Number=1,Type=Float,Description="End Placement Probability for reference observations: Phred-scaled upper-bounds estimate of the probability of observing the deviation between EL and ER given E(EL/ER) ~ 0.5, derived using Hoeffding's inequality">
##INFO=<ID=DPRA,Number=A,Type=Float,Description="Alternate allele depth ratio.  Ratio between depth in samples with each called alternate allele and those without.">
##INFO=<ID=ODDS,Number=1,Type=Float,Description="The log odds ratio of the best genotype combination to the second-best.">
##INFO=<ID=GTI,Number=1,Type=Integer,Description="Number of genotyping iterations required to reach convergence or bailout.">
##INFO=<ID=TYPE,Number=A,Type=String,Description="The type of allele, either snp, mnp, ins, del, or complex.">
##INFO=<ID=CIGAR,Number=A,Type=String,Description="The extended CIGAR representation of each alternate allele, with the exception that '=' is replaced by 'M' to ease VCF parsing.  Note that INDEL alleles do not have the first matched base (which is provided by default, per the spec) referred to by the CIGAR.">
##INFO=<ID=NUMALT,Number=1,Type=Integer,Description="Number of unique non-reference alleles in called genotypes at this position.">
##INFO=<ID=MEANALT,Number=A,Type=Float,Description="Mean number of unique non-reference allele observations per sample with the corresponding alternate alleles.">
##INFO=<ID=LEN,Number=A,Type=Integer,Description="allele length">
##INFO=<ID=MQM,Number=A,Type=Float,Description="Mean mapping quality of observed alternate alleles">
##INFO=<ID=MQMR,Number=1,Type=Float,Description="Mean mapping quality of observed reference alleles">
##INFO=<ID=PAIRED,Number=A,Type=Float,Description="Proportion of observed alternate alleles which are supported by properly paired read fragments">
##INFO=<ID=PAIREDR,Number=1,Type=Float,Description="Proportion of observed reference alleles which are supported by properly paired read fragments">
##FORMAT=<ID=GT,Number=1,Type=String,Description="Genotype">
##FORMAT=<ID=GQ,Number=1,Type=Float,Description="Genotype Quality, the Phred-scaled marginal (or unconditional) probability of the called genotype">
##FORMAT=<ID=GL,Number=G,Type=Float,Description="Genotype Likelihood, log10-scaled likelihoods of the data given the called genotype for each possible genotype generated from the reference and alternate alleles given the sample ploidy">
##FORMAT=<ID=DP,Number=1,Type=Integer,Description="Read Depth">
##FORMAT=<ID=RO,Number=1,Type=Integer,Description="Reference allele observation count">
##FORMAT=<ID=QR,Number=1,Type=Integer,Description="Sum of quality of the reference observations">
##FORMAT=<ID=AO,Number=A,Type=Integer,Description="Alternate allele observation count">
##FORMAT=<ID=QA,Number=A,Type=Integer,Description="Sum of quality of the alternate observations">
#CHROM	POS	ID	REF	ALT	QUAL	FILTER	INFO	FORMAT	unknown
hsv1	8954	.	A	G	1212.29	.	AB=0;ABP=0;AC=2;AF=1;AN=2;AO=53;CIGAR=1X;DP=59;DPB=59;DPRA=0;EPP=118.098;EPPR=16.0391;GTI=0;LEN=1;MEANALT=1;MQM=23;MQMR=45;NS=1;NUMALT=1;ODDS=61.0934;PAIRED=1;PAIREDR=1;PAO=0;PQA=0;PQR=0;PRO=0;QA=1827;QR=12;RO=6;RPP=118.098;RPPR=16.0391;RUN=1;SAF=0;SAP=118.098;SAR=53;SRF=6;SRP=16.0391;SRR=0;TYPE=snp	GT:DP:RO:QR:AO:QA:GL	1/1:59:6:12:53:1827:-10,-9.007,0
hsv1	9642	.	T	G	49647.4	.	AB=0.344769;ABP=4206.39;AC=1;AF=0.5;AN=2;AO=6924;CIGAR=1X;DP=20083;DPB=20083;DPRA=0;EPP=6541.37;EPPR=642.71;GTI=0;LEN=1;MEANALT=3;MQM=58.3043;MQMR=59.9141;NS=1;NUMALT=1;ODDS=11431.7;PAIRED=0.978625;PAIREDR=0.988479;PAO=0;PQA=0;PQR=0;PRO=0;QA=103383;QR=425793;RO=13107;RPP=6529.92;RPPR=44.927;RUN=1;SAF=6918;SAP=14986.2;SAR=6;SRF=3379;SRP=6681.24;SRR=9728;TYPE=snp	GT:DP:RO:QR:AO:QA:GL	0/1:20083:13107:425793:6924:103383:-10,0,-10
hsv1	10654	.	T	C	638178	.	AB=0;ABP=0;AC=2;AF=1;AN=2;AO=20739;CIGAR=1X;DP=20776;DPB=20776;DPRA=0;EPP=4.34728;EPPR=4.03889;GTI=0;LEN=1;MEANALT=3;MQM=59.9905;MQMR=59;NS=1;NUMALT=1;ODDS=28452.8;PAIRED=0.994262;PAIREDR=1;PAO=0;PQA=0;PQR=0;PRO=0;QA=709347;QR=180;RO=19;RPP=21.3924;RPPR=8.61041;RUN=1;SAF=10597;SAP=24.6868;SAR=10142;SRF=6;SRP=8.61041;SRR=13;TYPE=snp	GT:DP:RO:QR:AO:QA:GL	1/1:20776:19:180:20739:709347:-10,-10,0
hsv1	15227	.	G	C	765007	.	AB=0;ABP=0;AC=2;AF=1;AN=2;AO=23520;CIGAR=1X;DP=23550;DPB=23550;DPRA=0;EPP=5.03258;EPPR=3.44459;GTI=0;LEN=1;MEANALT=3;MQM=59.9834;MQMR=60;NS=1;NUMALT=1;ODDS=32511.2;PAIRED=0.991327;PAIREDR=1;PAO=0;PQA=0;PQR=0;PRO=0;QA=850429;QR=92;RO=5;RPP=29.3372;RPPR=3.44459;RUN=1;SAF=10989;SAP=222.536;SAR=12531;SRF=4;SRP=6.91895;SRR=1;TYPE=snp	GT:DP:RO:QR:AO:QA:GL	1/1:23550:5:92:23520:850429:-10,-10,0
hsv1	16216	.	T	G	690230	.	AB=0;ABP=0;AC=2;AF=1;AN=2;AO=20704;CIGAR=1X;DP=20742;DPB=20742;DPRA=0;EPP=8.75321;EPPR=7.89611;GTI=0;LEN=1;MEANALT=3;MQM=59.9938;MQMR=60;NS=1;NUMALT=1;ODDS=28445.9;PAIRED=0.994107;PAIREDR=1;PAO=0;PQA=0;PQR=0;PRO=0;QA=767262;QR=179;RO=16;RPP=122.641;RPPR=11.6962;RUN=1;SAF=10413;SAP=4.57136;SAR=10291;SRF=3;SRP=16.582;SRR=13;TYPE=snp	GT:DP:RO:QR:AO:QA:GL	1/1:20742:16:179:20704:767262:-10,-10,0
hsv1	16936	.	A	C	20424.6	.	AB=0.357612;ABP=3056.58;AC=1;AF=0.5;AN=2;AO=6201;CIGAR=1X;DP=17340;DPB=17340;DPRA=0;EPP=1507.85;EPPR=361.415;GTI=0;LEN=1;MEANALT=3;MQM=59.7338;MQMR=59.9789;NS=1;NUMALT=1;ODDS=4702.94;PAIRED=0.997097;PAIREDR=0.994476;PAO=0;PQA=0;PQR=0;PRO=0;QA=53606;QR=334517;RO=11042;RPP=1507.85;RPPR=97.1816;RUN=1;SAF=0;SAP=13468.3;SAR=6201;SRF=6183;SRP=347.743;SRR=4859;TYPE=snp	GT:DP:RO:QR:AO:QA:GL	0/1:17340:11042:334517:6201:53606:-10,0,-10
hsv1	17735	.	T	C	806737	.	AB=0;ABP=0;AC=2;AF=1;AN=2;AO=23993;CIGAR=1X;DP=24028;DPB=24028;DPRA=0;EPP=118.78;EPPR=5.8675;GTI=0;LEN=1;MEANALT=3;MQM=59.9951;MQMR=60;NS=1;NUMALT=1;ODDS=32885.6;PAIRED=0.994082;PAIREDR=1;PAO=0;PQA=0;PQR=0;PRO=0;QA=897320;QR=536;RO=19;RPP=193.558;RPPR=12.2676;RUN=1;SAF=11686;SAP=37.9125;SAR=12307;SRF=6;SRP=8.61041;SRR=13;TYPE=snp	GT:DP:RO:QR:AO:QA:GL	1/1:24028:19:536:23993:897320:-10,-10,0
hsv1	20591	.	T	G	34229.2	.	AB=0.299786;ABP=5849.66;AC=1;AF=0.5;AN=2;AO=5034;CIGAR=1X;DP=16792;DPB=16792;DPRA=0;EPP=2821.15;EPPR=1233.04;GTI=0;LEN=1;MEANALT=3;MQM=59.2489;MQMR=59.9191;NS=1;NUMALT=1;ODDS=7881.56;PAIRED=0.997616;PAIREDR=0.995018;PAO=0;PQA=0;PQR=0;PRO=0;QA=56363;QR=241898;RO=11642;RPP=31.28;RPPR=321.146;RUN=1;SAF=1536;SAP=1663.51;SAR=3498;SRF=7165;SRP=1350.69;SRR=4477;TYPE=snp	GT:DP:RO:QR:AO:QA:GL	0/1:16792:11642:241898:5034:56363:-10,0,-10
hsv1	22420	.	C	G	672668	.	AB=0;ABP=0;AC=2;AF=1;AN=2;AO=20875;CIGAR=1X;DP=20904;DPB=20904;DPRA=0;EPP=393.3;EPPR=4.78696;GTI=0;LEN=1;MEANALT=3;MQM=59.9918;MQMR=60;NS=1;NUMALT=1;ODDS=28753.4;PAIRED=0.994826;PAIREDR=1;PAO=0;PQA=0;PQR=0;PRO=0;QA=749359;QR=129;RO=11;RPP=332.225;RPPR=3.20771;RUN=1;SAF=11886;SAP=876.032;SAR=8989;SRF=4;SRP=4.78696;SRR=7;TYPE=snp	GT:DP:RO:QR:AO:QA:GL	1/1:20904:11:129:20875:749359:-10,-10,0
hsv1	22649	.	A	G	706172	.	AB=0;ABP=0;AC=2;AF=1;AN=2;AO=21074;CIGAR=1X;DP=21094;DPB=21094;DPRA=0;EPP=7.38292;EPPR=3.20771;GTI=0;LEN=1;MEANALT=3;MQM=59.9869;MQMR=60;NS=1;NUMALT=1;ODDS=28988.9;PAIRED=0.994733;PAIREDR=1;PAO=0;PQA=0;PQR=0;PRO=0;QA=785047;QR=325;RO=11;RPP=3.10304;RPPR=7.94546;RUN=1;SAF=10258;SAP=35.0934;SAR=10816;SRF=4;SRP=4.78696;SRR=7;TYPE=snp	GT:DP:RO:QR:AO:QA:GL	1/1:21094:11:325:21074:785047:-10,-10,0
hsv1	26714	.	T	C	569777	.	AB=0;ABP=0;AC=2;AF=1;AN=2;AO=18683;CIGAR=1X;DP=18751;DPB=18751;DPRA=0;EPP=55.3405;EPPR=3.49285;GTI=0;LEN=1;MEANALT=3;MQM=59.963;MQMR=59;NS=1;NUMALT=1;ODDS=25591.2;PAIRED=0.995236;PAIREDR=1;PAO=0;PQA=0;PQR=0;PRO=0;QA=634624;QR=329;RO=18;RPP=3.66408;RPPR=3.49285;RUN=1;SAF=7864;SAP=1017.91;SAR=10819;SRF=2;SRP=26.6552;SRR=16;TYPE=snp	GT:DP:RO:QR:AO:QA:GL	1/1:18751:18:329:18683:634624:-10,-10,0
hsv1	37236	.	G	C	603930	.	AB=0;ABP=0;AC=2;AF=1;AN=2;AO=19271;CIGAR=1X;DP=19286;DPB=19286;DPRA=0;EPP=106.209;EPPR=3.44459;GTI=0;LEN=1;MEANALT=3;MQM=59.9724;MQMR=59.2;NS=1;NUMALT=1;ODDS=26622.2;PAIRED=0.99341;PAIREDR=1;PAO=0;PQA=0;PQR=0;PRO=0;QA=671481;QR=92;RO=5;RPP=42.9021;RPPR=3.44459;RUN=1;SAF=9107;SAP=128.903;SAR=10164;SRF=2;SRP=3.44459;SRR=3;TYPE=snp	GT:DP:RO:QR:AO:QA:GL	1/1:19286:5:92:19271:671481:-10,-10,0
hsv1	37263	.	A	C	32257.2	.	AB=0.348478;ABP=3953.3;AC=1;AF=0.5;AN=2;AO=6903;CIGAR=1X;DP=19809;DPB=19809;DPRA=0;EPP=1868.16;EPPR=1652.2;GTI=0;LEN=1;MEANALT=3;MQM=59.8674;MQMR=59.9886;NS=1;NUMALT=1;ODDS=7427.48;PAIRED=0.993916;PAIREDR=0.994223;PAO=0;PQA=0;PQR=0;PRO=0;QA=71913;QR=427653;RO=12809;RPP=1871.23;RPPR=333.861;RUN=1;SAF=1;SAP=14984;SAR=6902;SRF=9923;SRP=8397.88;SRR=2886;TYPE=snp	GT:DP:RO:QR:AO:QA:GL	0/1:19809:12809:427653:6903:71913:-10,0,-10
hsv1	37447	.	A	C	11183.5	.	AB=0.336906;ABP=4681.4;AC=1;AF=0.5;AN=2;AO=6822;CIGAR=1X;DP=20249;DPB=20249;DPRA=0;EPP=1420.13;EPPR=386.09;GTI=0;LEN=1;MEANALT=3;MQM=59.7602;MQMR=59.9852;NS=1;NUMALT=1;ODDS=2575.1;PAIRED=0.997508;PAIREDR=0.993951;PAO=0;PQA=0;PQR=0;PRO=0;QA=48943;QR=482637;RO=13391;RPP=1428.2;RPPR=347.25;RUN=1;SAF=3;SAP=14790.7;SAR=6819;SRF=11460;SRP=14727.4;SRR=1931;TYPE=snp	GT:DP:RO:QR:AO:QA:GL	0/1:20249:13391:482637:6822:48943:-10,0,-10
hsv1	40808	.	G	C	53608.8	.	AB=0.283956;ABP=8369.54;AC=1;AF=0.5;AN=2;AO=5860;CIGAR=1X;DP=20637;DPB=20637;DPRA=0;EPP=4994.02;EPPR=155.515;GTI=0;LEN=1;MEANALT=3;MQM=58.9415;MQMR=59.8639;NS=1;NUMALT=1;ODDS=12343.9;PAIRED=0.997952;PAIREDR=0.994975;PAO=0;PQA=0;PQR=0;PRO=0;QA=109624;QR=385517;RO=14727;RPP=4972.29;RPPR=1814.42;RUN=1;SAF=5840;SAP=12554.7;SAR=20;SRF=4451;SRP=5006.03;SRR=10276;TYPE=snp	GT:DP:RO:QR:AO:QA:GL	0/1:20637:14727:385517:5860:109624:-10,0,-10
hsv1	40813	.	A	C	3661.12	.	AB=0.229515;ABP=14032.5;AC=1;AF=0.5;AN=2;AO=5067;CIGAR=1X;DP=22077;DPB=22077;DPRA=0;EPP=7056.65;EPPR=1419.87;GTI=0;LEN=1;MEANALT=3;MQM=58.6937;MQMR=59.9045;NS=1;NUMALT=1;ODDS=843.005;PAIRED=0.997829;PAIREDR=0.994439;PAO=0;PQA=0;PQR=0;PRO=0;QA=68387;QR=475764;RO=16903;RPP=6938.92;RPPR=1548.97;RUN=1;SAF=4928;SAP=9831.64;SAR=139;SRF=6473;SRP=2014.52;SRR=10430;TYPE=snp	GT:DP:RO:QR:AO:QA:GL	0/1:22077:16903:475764:5067:68387:-10,0,-10
hsv1	46834	.	A	G	748961	.	AB=0;ABP=0;AC=2;AF=1;AN=2;AO=22524;CIGAR=1X;DP=22562;DPB=22562;DPRA=0;EPP=190.89;EPPR=7.35324;GTI=0;LEN=1;MEANALT=3;MQM=59.9928;MQMR=59.6667;NS=1;NUMALT=1;ODDS=30901;PAIRED=0.988634;PAIREDR=0.888889;PAO=0;PQA=0;PQR=0;PRO=0;QA=833141;QR=377;RO=18;RPP=284.255;RPPR=7.35324;RUN=1;SAF=10916;SAP=49.1762;SAR=11608;SRF=16;SRP=26.6552;SRR=2;TYPE=snp	GT:DP:RO:QR:AO:QA:GL	1/1:22562:18:377:22524:833141:-10,-10,0
hsv1	47534	.	A	C	8993.89	.	AB=0.32242;ABP=5666.85;AC=1;AF=0.5;AN=2;AO=6667;CIGAR=1X;DP=20678;DPB=20678;DPRA=0;EPP=4863.42;EPPR=1151.22;GTI=0;LEN=1;MEANALT=3;MQM=59.2755;MQMR=59.925;NS=1;NUMALT=1;ODDS=2070.92;PAIRED=0.99685;PAIREDR=0.994401;PAO=0;PQA=0;PQR=0;PRO=0;QA=56175;QR=488973;RO=13930;RPP=4828.26;RPPR=18.9729;RUN=1;SAF=9;SAP=14402.1;SAR=6658;SRF=12089;SRP=16374.2;SRR=1841;TYPE=snp	GT:DP:RO:QR:AO:QA:GL	0/1:20678:13930:488973:6667:56175:-10,0,-10
hsv1	47701	.	T	C	716057	.	AB=0;ABP=0;AC=2;AF=1;AN=2;AO=21598;CIGAR=1X;DP=21643;DPB=21643;DPRA=0;EPP=5.09511;EPPR=8.61041;GTI=0;LEN=1;MEANALT=3;MQM=59.9902;MQMR=60;NS=1;NUMALT=1;ODDS=29574.7;PAIRED=0.990369;PAIREDR=1;PAO=0;PQA=0;PQR=0;PRO=0;QA=796292;QR=498;RO=19;RPP=114.702;RPPR=3.12459;RUN=1;SAF=10689;SAP=7.87646;SAR=10909;SRF=10;SRP=3.12459;SRR=9;TYPE=snp	GT:DP:RO:QR:AO:QA:GL	1/1:21643:19:498:21598:796292:-10,-10,0
hsv1	48451	.	A	G	705716	.	AB=0;ABP=0;AC=2;AF=1;AN=2;AO=21877;CIGAR=1X;DP=21946;DPB=21946;DPRA=0;EPP=7.02043;EPPR=8.07707;GTI=0;LEN=1;MEANALT=3;MQM=59.9656;MQMR=59.7143;NS=1;NUMALT=1;ODDS=29964.8;PAIRED=0.99552;PAIREDR=1;PAO=0;PQA=0;PQR=0;PRO=0;QA=785201;QR=361;RO=21;RPP=19.2911;RPPR=3.1137;RUN=1;SAF=9726;SAP=586.711;SAR=12151;SRF=13;SRP=5.59539;SRR=8;TYPE=snp	GT:DP:RO:QR:AO:QA:GL	1/1:21946:21:361:21877:785201:-10,-10,0
hsv1	50418	.	G	T	8820.3	.	AB=0.323099;ABP=4925.32;AC=1;AF=0.5;AN=2;AO=5851;CIGAR=1X;DP=18109;DPB=18109;DPRA=0;EPP=6293.52;EPPR=7.61002;GTI=0;LEN=1;MEANALT=3;MQM=59.3073;MQMR=59.9846;NS=1;NUMALT=1;ODDS=2030.95;PAIRED=0.996582;PAIREDR=0.992237;PAO=0;PQA=0;PQR=0;PRO=0;QA=55733;QR=445724;RO=12237;RPP=6269.1;RPPR=213.454;RUN=1;SAF=5843;SAP=12638.9;SAR=8;SRF=1555;SRP=14785.1;SRR=10682;TYPE=snp	GT:DP:RO:QR:AO:QA:GL	0/1:18109:12237:445724:5851:55733:-10,0,-10
hsv1	50595	.	A	G	675386	.	AB=0;ABP=0;AC=2;AF=1;AN=2;AO=20978;CIGAR=1X;DP=21027;DPB=21027;DPRA=0;EPP=394.196;EPPR=3.0103;GTI=0;LEN=1;MEANALT=3;MQM=59.9925;MQMR=59.0833;NS=1;NUMALT=1;ODDS=28709.3;PAIRED=0.983602;PAIREDR=1;PAO=0;PQA=0;PQR=0;PRO=0;QA=751532;QR=232;RO=24;RPP=31.8678;RPPR=3.0103;RUN=1;SAF=9606;SAP=325.839;SAR=11372;SRF=10;SRP=4.45795;SRR=14;TYPE=snp	GT:DP:RO:QR:AO:QA:GL	1/1:21027:24:232:20978:751532:-10,-10,0
hsv1	50879	.	C	T	717211	.	AB=0;ABP=0;AC=2;AF=1;AN=2;AO=21567;CIGAR=1X;DP=21604;DPB=21604;DPRA=0;EPP=107.968;EPPR=4.31318;GTI=0;LEN=1;MEANALT=3;MQM=59.9912;MQMR=60;NS=1;NUMALT=1;ODDS=29627.5;PAIRED=0.986461;PAIREDR=1;PAO=0;PQA=0;PQR=0;PRO=0;QA=797921;QR=285;RO=15;RPP=91.0316;RPPR=10.1038;RUN=1;SAF=9748;SAP=434.852;SAR=11819;SRF=8;SRP=3.15506;SRR=7;TYPE=snp	GT:DP:RO:QR:AO:QA:GL	1/1:21604:15:285:21567:797921:-10,-10,0
hsv1	52181	.	C	G	224433	.	AB=0;ABP=0;AC=2;AF=1;AN=2;AO=8832;CIGAR=1X;DP=8868;DPB=8868;DPRA=0;EPP=909.364;EPPR=59.7581;GTI=0;LEN=1;MEANALT=3;MQM=59.8468;MQMR=58.8;NS=1;NUMALT=1;ODDS=11911.6;PAIRED=0.99298;PAIREDR=1;PAO=0;PQA=0;PQR=0;PRO=0;QA=262472;QR=79;RO=30;RPP=1544.58;RPPR=31.9633;RUN=1;SAF=1468;SAP=8549.94;SAR=7364;SRF=24;SRP=26.4622;SRR=6;TYPE=snp	GT:DP:RO:QR:AO:QA:GL	1/1:8868:30:79:8832:262472:-10,-10,0
hsv1	55577	.	C	T	560346	.	AB=0;ABP=0;AC=2;AF=1;AN=2;AO=17330;CIGAR=1X;DP=17339;DPB=17339;DPRA=0;EPP=2508.88;EPPR=3.44459;GTI=0;LEN=1;MEANALT=3;MQM=59.9737;MQMR=60;NS=1;NUMALT=1;ODDS=23937.9;PAIRED=0.993249;PAIREDR=1;PAO=0;PQA=0;PQR=0;PRO=0;QA=635932;QR=77;RO=5;RPP=8.1231;RPPR=3.44459;RUN=1;SAF=4439;SAP=8954.08;SAR=12891;SRF=0;SRP=13.8677;SRR=5;TYPE=snp	GT:DP:RO:QR:AO:QA:GL	1/1:17339:5:77:17330:635932:-10,-10,0
hsv1	55724	.	C	A	484345	.	AB=0;ABP=0;AC=2;AF=1;AN=2;AO=15251;CIGAR=1X;DP=15289;DPB=15289;DPRA=0;EPP=33.2695;EPPR=5.61607;GTI=0;LEN=1;MEANALT=3;MQM=59.9918;MQMR=58.8;NS=1;NUMALT=1;ODDS=20703.1;PAIRED=0.991804;PAIREDR=1;PAO=0;PQA=0;PQR=0;PRO=0;QA=544143;QR=313;RO=30;RPP=304.437;RPPR=3.29983;RUN=1;SAF=10476;SAP=4630.63;SAR=4775;SRF=10;SRP=10.2485;SRR=20;TYPE=snp	GT:DP:RO:QR:AO:QA:GL	1/1:15289:30:313:15251:544143:-10,-10,0
hsv1	60630	.	G	C	735735	.	AB=0;ABP=0;AC=2;AF=1;AN=2;AO=22120;CIGAR=1X;DP=22147;DPB=22147;DPRA=0;EPP=140.163;EPPR=5.80219;GTI=0;LEN=1;MEANALT=3;MQM=59.9841;MQMR=60;NS=1;NUMALT=1;ODDS=30536.1;PAIRED=0.99462;PAIREDR=0.857143;PAO=0;PQA=0;PQR=0;PRO=0;QA=817887;QR=123;RO=7;RPP=36.7207;RPPR=5.80219;RUN=1;SAF=10748;SAP=41.2345;SAR=11372;SRF=2;SRP=5.80219;SRR=5;TYPE=snp	GT:DP:RO:QR:AO:QA:GL	1/1:22147:7:123:22120:817887:-10,-10,0
hsv1	61138	.	C	G	604739	.	AB=0;ABP=0;AC=2;AF=1;AN=2;AO=19415;CIGAR=1X;DP=19432;DPB=19432;DPRA=0;EPP=79.5044;EPPR=3.44459;GTI=0;LEN=1;MEANALT=3;MQM=59.9724;MQMR=58.2;NS=1;NUMALT=1;ODDS=26834;PAIRED=0.994643;PAIREDR=1;PAO=0;PQA=0;PQR=0;PRO=0;QA=672327;QR=33;RO=5;RPP=5.98191;RPPR=3.44459;RUN=1;SAF=10370;SAP=199.368;SAR=9045;SRF=2;SRP=3.44459;SRR=3;TYPE=snp	GT:DP:RO:QR:AO:QA:GL	1/1:19432:5:33:19415:672327:-10,-10,0
hsv1	61382	.	T	A	765302	.	AB=0;ABP=0;AC=2;AF=1;AN=2;AO=23186;CIGAR=1X;DP=23211;DPB=23211;DPRA=0;EPP=372.402;EPPR=7.94546;GTI=0;LEN=1;MEANALT=3;MQM=59.9912;MQMR=60;NS=1;NUMALT=1;ODDS=31961.7;PAIRED=0.9865;PAIREDR=1;PAO=0;PQA=0;PQR=0;PRO=0;QA=850934;QR=117;RO=11;RPP=17.8455;RPPR=4.78696;RUN=1;SAF=11850;SAP=27.7534;SAR=11336;SRF=10;SRP=19.0002;SRR=1;TYPE=snp	GT:DP:RO:QR:AO:QA:GL	1/1:23211:11:117:23186:850934:-10,-10,0
hsv1	63637	.	T	C	729094	.	AB=0;ABP=0;AC=2;AF=1;AN=2;AO=21996;CIGAR=1X;DP=22024;DPB=22024;DPRA=0;EPP=41.45;EPPR=3.32051;GTI=0;LEN=1;MEANALT=3;MQM=59.9945;MQMR=60;NS=1;NUMALT=1;ODDS=30351.5;PAIRED=0.993181;PAIREDR=1;PAO=0;PQA=0;PQR=0;PRO=0;QA=810523;QR=179;RO=7;RPP=51.9381;RPPR=3.32051;RUN=1;SAF=11452;SAP=84.4024;SAR=10544;SRF=2;SRP=5.80219;SRR=5;TYPE=snp	GT:DP:RO:QR:AO:QA:GL	1/1:22024:7:179:21996:810523:-10,-10,0
hsv1	68539	.	G	A	809192	.	AB=0;ABP=0;AC=2;AF=1;AN=2;AO=23933;CIGAR=1X;DP=23954;DPB=23954;DPRA=0;EPP=276.762;EPPR=5.9056;GTI=0;LEN=1;MEANALT=3;MQM=59.9891;MQMR=60;NS=1;NUMALT=1;ODDS=32934.7;PAIRED=0.993106;PAIREDR=0.916667;PAO=0;PQA=0;PQR=0;PRO=0;QA=899830;QR=334;RO=12;RPP=25.0625;RPPR=3.73412;RUN=1;SAF=11731;SAP=23.1382;SAR=12202;SRF=3;SRP=9.52472;SRR=9;TYPE=snp	GT:DP:RO:QR:AO:QA:GL	1/1:23954:12:334:23933:899830:-10,-10,0
hsv1	71653	.	T	G	98.4929	.	AB=0.335058;ABP=185.675;AC=1;AF=0.5;AN=2;AO=259;CIGAR=1X;DP=773;DPB=773;DPRA=0;EPP=296.193;EPPR=31.6397;GTI=0;LEN=1;MEANALT=3;MQM=25.7143;MQMR=25.7922;NS=1;NUMALT=1;ODDS=22.6788;PAIRED=1;PAIREDR=0.931373;PAO=0;PQA=0;PQR=0;PRO=0;QA=2184;QR=10618;RO=510;RPP=296.193;RPPR=506.86;RUN=1;SAF=0;SAP=565.422;SAR=259;SRF=213;SRP=33.0533;SRR=297;TYPE=snp	GT:DP:RO:QR:AO:QA:GL	0/1:773:510:10618:259:2184:-10,0,-10
hsv1	71665	.	T	G	648.326	.	AB=0.327718;ABP=339.705;AC=1;AF=0.5;AN=2;AO=428;CIGAR=1X;DP=1306;DPB=1306;DPRA=0;EPP=441.546;EPPR=3.07248;GTI=0;LEN=1;MEANALT=2;MQM=33.9907;MQMR=26.2921;NS=1;NUMALT=1;ODDS=149.283;PAIRED=1;PAIREDR=0.918671;PAO=0;PQA=0;PQR=0;PRO=0;QA=4059;QR=17640;RO=873;RPP=441.546;RPPR=617.413;RUN=1;SAF=0;SAP=932.4;SAR=428;SRF=367;SRP=51.0687;SRR=506;TYPE=snp	GT:DP:RO:QR:AO:QA:GL	0/1:1306:873:17640:428:4059:-10,0,-10
hsv1	71671	.	T	G	128.875	.	AB=0.273579;ABP=715.927;AC=1;AF=0.5;AN=2;AO=438;CIGAR=1X;DP=1601;DPB=1601;DPRA=0;EPP=380.668;EPPR=175.436;GTI=0;LEN=1;MEANALT=3;MQM=36.3037;MQMR=29.447;NS=1;NUMALT=1;ODDS=29.6747;PAIRED=1;PAIREDR=0.915863;PAO=0;PQA=0;PQR=0;PRO=0;QA=4130;QR=27437;RO=1141;RPP=375.215;RPPR=121.006;RUN=1;SAF=1;SAP=945.449;SAR=437;SRF=507;SRP=33.7059;SRR=634;TYPE=snp	GT:DP:RO:QR:AO:QA:GL	0/1:1601:1141:27437:438:4130:-10,0,-10
hsv1	71784	.	C	T	52321.9	.	AB=0.789252;ABP=2761.64;AC=1;AF=0.5;AN=2;AO=2996;CIGAR=1X;DP=3796;DPB=3796;DPRA=0;EPP=5807.79;EPPR=1021.69;GTI=0;LEN=1;MEANALT=3;MQM=44.5901;MQMR=15.7527;NS=1;NUMALT=1;ODDS=2288.57;PAIRED=0.995995;PAIREDR=0.994536;PAO=0;PQA=0;PQR=0;PRO=0;QA=91704;QR=23303;RO=732;RPP=6491.38;RPPR=1592.53;RUN=1;SAF=2915;SAP=5824.21;SAR=81;SRF=659;SRP=1021.69;SRR=73;TYPE=snp	GT:DP:RO:QR:AO:QA:GL	0/1:3796:732:23303:2996:91704:-10,0,-10
hsv1	72945	.	T	C	608056	.	AB=0;ABP=0;AC=2;AF=1;AN=2;AO=18958;CIGAR=1X;DP=18991;DPB=18991;DPRA=0;EPP=164.124;EPPR=3.55317;GTI=0;LEN=1;MEANALT=3;MQM=59.9931;MQMR=58.8125;NS=1;NUMALT=1;ODDS=25975.6;PAIRED=0.971885;PAIREDR=0.9375;PAO=0;PQA=0;PQR=0;PRO=0;QA=676834;QR=404;RO=16;RPP=163.039;RPPR=3.55317;RUN=1;SAF=10372;SAP=368.373;SAR=8586;SRF=8;SRP=3.0103;SRR=8;TYPE=snp	GT:DP:RO:QR:AO:QA:GL	1/1:18991:16:404:18958:676834:-10,-10,0
hsv1	79370	.	T	G	7054.65	.	AB=0.309675;ABP=5912.18;AC=1;AF=0.5;AN=2;AO=5816;CIGAR=1X;DP=18781;DPB=18781;DPRA=0;EPP=2550.29;EPPR=172.779;GTI=0;LEN=1;MEANALT=3;MQM=59.597;MQMR=59.9748;NS=1;NUMALT=1;ODDS=1624.39;PAIRED=0.997077;PAIREDR=0.994861;PAO=0;PQA=0;PQR=0;PRO=0;QA=46068;QR=425694;RO=12842;RPP=2542.49;RPPR=4.31974;RUN=1;SAF=5808;SAP=12562.9;SAR=8;SRF=2581;SRP=9976.43;SRR=10261;TYPE=snp	GT:DP:RO:QR:AO:QA:GL	0/1:18781:12842:425694:5816:46068:-10,0,-10
hsv1	80639	.	A	C	3856.32	.	AB=0.329566;ABP=3151.01;AC=1;AF=0.5;AN=2;AO=4112;CIGAR=1X;DP=12477;DPB=12477;DPRA=0;EPP=1814.28;EPPR=242.463;GTI=0;LEN=1;MEANALT=3;MQM=59.7276;MQMR=59.582;NS=1;NUMALT=1;ODDS=887.95;PAIRED=0.99392;PAIREDR=0.995656;PAO=0;PQA=0;PQR=0;PRO=0;QA=28816;QR=266484;RO=8288;RPP=1802.56;RPPR=4296.25;RUN=1;SAF=13;SAP=8819.55;SAR=4099;SRF=5732;SRP=2645.82;SRR=2556;TYPE=snp	GT:DP:RO:QR:AO:QA:GL	0/1:12477:8288:266484:4112:28816:-10,0,-10
hsv1	81607	.	C	T	629195	.	AB=0;ABP=0;AC=2;AF=1;AN=2;AO=20653;CIGAR=1X;DP=20744;DPB=20744;DPRA=0;EPP=528.212;EPPR=22.5536;GTI=0;LEN=1;MEANALT=3;MQM=59.988;MQMR=59.52;NS=1;NUMALT=1;ODDS=28280;PAIRED=0.994432;PAIREDR=1;PAO=0;PQA=0;PQR=0;PRO=0;QA=699983;QR=149;RO=25;RPP=35.8648;RPPR=17.6895;RUN=1;SAF=9783;SAP=127.241;SAR=10870;SRF=22;SRP=34.3664;SRR=3;TYPE=snp	GT:DP:RO:QR:AO:QA:GL	1/1:20744:25:149:20653:699983:-10,-10,0
hsv1	85047	.	C	G	29983.1	.	AB=0.268688;ABP=7836.7;AC=1;AF=0.5;AN=2;AO=4529;CIGAR=1X;DP=16856;DPB=16856;DPRA=0;EPP=640.408;EPPR=15.3306;GTI=0;LEN=1;MEANALT=3;MQM=58.9391;MQMR=59.9327;NS=1;NUMALT=1;ODDS=6903.87;PAIRED=0.995805;PAIREDR=0.994953;PAO=0;PQA=0;PQR=0;PRO=0;QA=67752;QR=378728;RO=12284;RPP=633.792;RPPR=37.8585;RUN=1;SAF=5;SAP=9794.23;SAR=4524;SRF=8650;SRP=4450.65;SRR=3634;TYPE=snp	GT:DP:RO:QR:AO:QA:GL	0/1:16856:12284:378728:4529:67752:-10,0,-10
hsv1	86652	.	A	G	844194	.	AB=0;ABP=0;AC=2;AF=1;AN=2;AO=24758;CIGAR=1X;DP=24786;DPB=24786;DPRA=0;EPP=135.704;EPPR=4.45795;GTI=0;LEN=1;MEANALT=3;MQM=59.9951;MQMR=58.6667;NS=1;NUMALT=1;ODDS=34199.2;PAIRED=0.993497;PAIREDR=1;PAO=0;PQA=0;PQR=0;PRO=0;QA=938426;QR=156;RO=6;RPP=41.2159;RPPR=8.80089;RUN=1;SAF=12681;SAP=35.0075;SAR=12077;SRF=3;SRP=3.0103;SRR=3;TYPE=snp	GT:DP:RO:QR:AO:QA:GL	1/1:24786:6:156:24758:938426:-10,-10,0
hsv1	87291	.	C	T	543627	.	AB=0;ABP=0;AC=2;AF=1;AN=2;AO=19585;CIGAR=1X;DP=19653;DPB=19653;DPRA=0;EPP=15.0114;EPPR=11.1951;GTI=0;LEN=1;MEANALT=3;MQM=59.9438;MQMR=60;NS=1;NUMALT=1;ODDS=26936.3;PAIRED=0.993669;PAIREDR=0.846154;PAO=0;PQA=0;PQR=0;PRO=0;QA=604335;QR=152;RO=13;RPP=72.3822;RPPR=3.17734;RUN=1;SAF=9582;SAP=22.6618;SAR=10003;SRF=7;SRP=3.17734;SRR=6;TYPE=snp	GT:DP:RO:QR:AO:QA:GL	1/1:19653:13:152:19585:604335:-10,-10,0
hsv1	89975	.	A	G	722866	.	AB=0;ABP=0;AC=2;AF=1;AN=2;AO=21456;CIGAR=1X;DP=21486;DPB=21486;DPRA=0;EPP=5.4105;EPPR=4.51363;GTI=0;LEN=1;MEANALT=3;MQM=59.9919;MQMR=60;NS=1;NUMALT=1;ODDS=29473.5;PAIRED=0.993848;PAIREDR=1;PAO=0;PQA=0;PQR=0;PRO=0;QA=803870;QR=407;RO=13;RPP=80.6732;RPPR=4.51363;RUN=1;SAF=10167;SAP=130.417;SAR=11289;SRF=7;SRP=3.17734;SRR=6;TYPE=snp	GT:DP:RO:QR:AO:QA:GL	1/1:21486:13:407:21456:803870:-10,-10,0
hsv1	91723	.	C	T	460962	.	AB=0;ABP=0;AC=2;AF=1;AN=2;AO=17810;CIGAR=1X;DP=20297;DPB=20297;DPRA=0;EPP=360.364;EPPR=37.9838;GTI=0;LEN=1;MEANALT=3;MQM=59.9903;MQMR=59.9529;NS=1;NUMALT=1;ODDS=23732.9;PAIRED=0.996519;PAIREDR=0.988235;PAO=0;PQA=0;PQR=0;PRO=0;QA=513101;QR=360;RO=85;RPP=197.192;RPPR=34.305;RUN=1;SAF=8293;SAP=185.674;SAR=9517;SRF=82;SRP=162.447;SRR=3;TYPE=snp	GT:DP:RO:QR:AO:QA:GL	1/1:20297:85:360:17810:513101:-10,-10,0
hsv1	92323	.	C	T	661319	.	AB=0;ABP=0;AC=2;AF=1;AN=2;AO=19554;CIGAR=1X;DP=19566;DPB=19566;DPRA=0;EPP=10.2881;EPPR=3.73412;GTI=0;LEN=1;MEANALT=3;MQM=59.9912;MQMR=60;NS=1;NUMALT=1;ODDS=27056.6;PAIRED=0.99596;PAIREDR=1;PAO=0;PQA=0;PQR=0;PRO=0;QA=734908;QR=39;RO=3;RPP=3.03873;RPPR=3.73412;RUN=1;SAF=9914;SAP=11.3475;SAR=9640;SRF=3;SRP=9.52472;SRR=0;TYPE=snp	GT:DP:RO:QR:AO:QA:GL	1/1:19566:3:39:19554:734908:-10,-10,0
hsv1	95182	.	A	G	509792	.	AB=0;ABP=0;AC=2;AF=1;AN=2;AO=16042;CIGAR=1X;DP=16078;DPB=16078;DPRA=0;EPP=68.9591;EPPR=6.20364;GTI=0;LEN=1;MEANALT=3;MQM=59.9792;MQMR=60;NS=1;NUMALT=1;ODDS=21913.3;PAIRED=0.994265;PAIREDR=1;PAO=0;PQA=0;PQR=0;PRO=0;QA=569735;QR=472;RO=17;RPP=21.9442;RPPR=3.13803;RUN=1;SAF=5918;SAP=2397.62;SAR=10124;SRF=6;SRP=6.20364;SRR=11;TYPE=snp	GT:DP:RO:QR:AO:QA:GL	1/1:16078:17:472:16042:569735:-10,-10,0
hsv1	95753	.	C	G	605144	.	AB=0;ABP=0;AC=2;AF=1;AN=2;AO=19354;CIGAR=1X;DP=19417;DPB=19417;DPRA=0;EPP=17.5511;EPPR=7.35324;GTI=0;LEN=1;MEANALT=3;MQM=59.9879;MQMR=59.25;NS=1;NUMALT=1;ODDS=26708.2;PAIRED=0.996125;PAIREDR=1;PAO=0;PQA=0;PQR=0;PRO=0;QA=672547;QR=40;RO=8;RPP=3.09826;RPPR=4.09604;RUN=1;SAF=9298;SAP=67.475;SAR=10056;SRF=7;SRP=12.7819;SRR=1;TYPE=snp	GT:DP:RO:QR:AO:QA:GL	1/1:19417:8:40:19354:672547:-10,-10,0
hsv1	96480	.	G	A	535760	.	AB=0;ABP=0;AC=2;AF=1;AN=2;AO=17226;CIGAR=1X;DP=17276;DPB=17276;DPRA=0;EPP=3.40562;EPPR=6.91895;GTI=0;LEN=1;MEANALT=3;MQM=59.9801;MQMR=58.6;NS=1;NUMALT=1;ODDS=23578.7;PAIRED=0.983629;PAIREDR=1;PAO=0;PQA=0;PQR=0;PRO=0;QA=597038;QR=212;RO=20;RPP=73.5402;RPPR=4.74748;RUN=1;SAF=7002;SAP=1311.65;SAR=10224;SRF=1;SRP=38.1882;SRR=19;TYPE=snp	GT:DP:RO:QR:AO:QA:GL	1/1:17276:20:212:17226:597038:-10,-10,0
hsv1	96724	.	G	C	40071	.	AB=0.290421;ABP=6371.61;AC=1;AF=0.5;AN=2;AO=4848;CIGAR=1X;DP=16693;DPB=16693;DPRA=0;EPP=2709.18;EPPR=57.1913;GTI=0;LEN=1;MEANALT=3;MQM=58.709;MQMR=59.9704;NS=1;NUMALT=1;ODDS=9226.68;PAIRED=0.997731;PAIREDR=0.978421;PAO=0;PQA=0;PQR=0;PRO=0;QA=81498;QR=413276;RO=11817;RPP=2700.38;RPPR=314.997;RUN=1;SAF=4844;SAP=10495.6;SAR=4;SRF=1933;SRP=11619.9;SRR=9884;TYPE=snp	GT:DP:RO:QR:AO:QA:GL	0/1:16693:11817:413276:4848:81498:-10,0,-10
hsv1	103106	.	C	G	20007.7	.	AB=0.315901;ABP=4027.85;AC=1;AF=0.5;AN=2;AO=4319;CIGAR=1X;DP=13672;DPB=13672;DPRA=0;EPP=5561.47;EPPR=349.422;GTI=0;LEN=1;MEANALT=3;MQM=58.7824;MQMR=59.9629;NS=1;NUMALT=1;ODDS=4606.93;PAIRED=0.997453;PAIREDR=0.993891;PAO=0;PQA=0;PQR=0;PRO=0;QA=59763;QR=307986;RO=9330;RPP=5554.78;RPPR=149.739;RUN=1;SAF=3;SAP=9355.56;SAR=4316;SRF=8201;SRP=11643.1;SRR=1129;TYPE=snp	GT:DP:RO:QR:AO:QA:GL	0/1:13672:9330:307986:4319:59763:-10,0,-10
hsv1	108110	.	T	C	687414	.	AB=0;ABP=0;AC=2;AF=1;AN=2;AO=21004;CIGAR=1X;DP=21052;DPB=21052;DPRA=0;EPP=419.86;EPPR=12.8806;GTI=0;LEN=1;MEANALT=3;MQM=59.9896;MQMR=60;NS=1;NUMALT=1;ODDS=28718.8;PAIRED=0.993001;PAIREDR=1;PAO=0;PQA=0;PQR=0;PRO=0;QA=765830;QR=500;RO=22;RPP=506.121;RPPR=6.56362;RUN=1;SAF=9469;SAP=444.289;SAR=11535;SRF=6;SRP=12.8806;SRR=16;TYPE=snp	GT:DP:RO:QR:AO:QA:GL	1/1:21052:22:500:21004:765830:-10,-10,0
hsv1	108738	.	A	G	685025	.	AB=0;ABP=0;AC=2;AF=1;AN=2;AO=20830;CIGAR=1X;DP=20857;DPB=20857;DPRA=0;EPP=15.3465;EPPR=3.0103;GTI=0;LEN=1;MEANALT=3;MQM=59.9843;MQMR=60;NS=1;NUMALT=1;ODDS=28706.4;PAIRED=0.993999;PAIREDR=1;PAO=0;PQA=0;PQR=0;PRO=0;QA=761478;QR=117;RO=10;RPP=3.4644;RPPR=3.87889;RUN=1;SAF=9833;SAP=144.255;SAR=10997;SRF=5;SRP=3.0103;SRR=5;TYPE=snp	GT:DP:RO:QR:AO:QA:GL	1/1:20857:10:117:20830:761478:-10,-10,0
hsv1	114880	.	A	G	677115	.	AB=0;ABP=0;AC=2;AF=1;AN=2;AO=20570;CIGAR=1X;DP=20601;DPB=20601;DPRA=0;EPP=28.15;EPPR=3.15506;GTI=0;LEN=1;MEANALT=3;MQM=59.9932;MQMR=60;NS=1;NUMALT=1;ODDS=28199.4;PAIRED=0.995284;PAIREDR=1;PAO=0;PQA=0;PQR=0;PRO=0;QA=753096;QR=505;RO=15;RPP=120.73;RPPR=3.15506;RUN=1;SAF=10546;SAP=31.7751;SAR=10024;SRF=8;SRP=3.15506;SRR=7;TYPE=snp	GT:DP:RO:QR:AO:QA:GL	1/1:20601:15:505:20570:753096:-10,-10,0
hsv1	115921	.	C	A	737849	.	AB=0;ABP=0;AC=2;AF=1;AN=2;AO=22286;CIGAR=1X;DP=22315;DPB=22315;DPRA=0;EPP=65.6819;EPPR=3.73412;GTI=0;LEN=1;MEANALT=3;MQM=59.9881;MQMR=57.9167;NS=1;NUMALT=1;ODDS=30714.9;PAIRED=0.994571;PAIREDR=1;PAO=0;PQA=0;PQR=0;PRO=0;QA=820410;QR=47;RO=12;RPP=154.282;RPPR=14.5915;RUN=1;SAF=10366;SAP=238.312;SAR=11920;SRF=9;SRP=9.52472;SRR=3;TYPE=snp	GT:DP:RO:QR:AO:QA:GL	1/1:22315:12:47:22286:820410:-10,-10,0
hsv1	117418	.	T	C	6807.85	.	AB=0;ABP=0;AC=2;AF=1;AN=2;AO=282;CIGAR=1X;DP=320;DPB=320;DPRA=0;EPP=556.074;EPPR=79.0118;GTI=0;LEN=1;MEANALT=2;MQM=17.7021;MQMR=33.2571;NS=1;NUMALT=1;ODDS=287.382;PAIRED=0.996454;PAIREDR=0.914286;PAO=0;PQA=0;PQR=0;PRO=0;QA=9811;QR=70;RO=35;RPP=615.366;RPPR=79.0118;RUN=1;SAF=275;SAP=556.074;SAR=7;SRF=0;SRP=79.0118;SRR=35;TYPE=snp	GT:DP:RO:QR:AO:QA:GL	1/1:320:35:70:282:9811:-10,-10,0
hsv1	117423	.	G	C	1911.02	.	AB=0.506711;ABP=3.24348;AC=1;AF=0.5;AN=2;AO=302;CIGAR=1X;DP=596;DPB=596;DPRA=0;EPP=658.795;EPPR=602.608;GTI=0;LEN=1;MEANALT=2;MQM=41.8344;MQMR=18.9167;NS=1;NUMALT=1;ODDS=440.029;PAIRED=0.986755;PAIREDR=0.996528;PAO=0;PQA=0;PQR=0;PRO=0;QA=5211;QR=9884;RO=288;RPP=658.795;RPPR=628.394;RUN=1;SAF=0;SAP=658.795;SAR=302;SRF=285;SRP=602.608;SRR=3;TYPE=snp	GT:DP:RO:QR:AO:QA:GL	0/1:596:288:9884:302:5211:-10,0,-10
hsv1	117584	.	A	G	658.834	.	AB=0.334719;ABP=117.141;AC=1;AF=0.5;AN=2;AO=161;CIGAR=1X;DP=481;DPB=481;DPRA=0;EPP=71.0003;EPPR=9.55195;GTI=0;LEN=1;MEANALT=2;MQM=22.6211;MQMR=33.9655;NS=1;NUMALT=1;ODDS=151.702;PAIRED=0.993789;PAIREDR=0.990596;PAO=0;PQA=0;PQR=0;PRO=0;QA=1761;QR=7238;RO=319;RPP=71.0003;RPPR=61.8851;RUN=1;SAF=0;SAP=352.617;SAR=161;SRF=160;SRP=3.01711;SRR=159;TYPE=snp	GT:DP:RO:QR:AO:QA:GL	0/1:481:319:7238:161:1761:-10,0,-10
hsv1	126585	.	A	C	45.5481	.	AB=0.636364;ABP=13.6703;AC=1;AF=0.5;AN=2;AO=42;CIGAR=1X;DP=66;DPB=66;DPRA=0;EPP=62.7775;EPPR=32.3252;GTI=0;LEN=1;MEANALT=1;MQM=29.0714;MQMR=34.5;NS=1;NUMALT=1;ODDS=10.4878;PAIRED=1;PAIREDR=1;PAO=0;PQA=0;PQR=0;PRO=0;QA=427;QR=307;RO=24;RPP=62.7775;RPPR=39.2015;RUN=1;SAF=42;SAP=94.2121;SAR=0;SRF=23;SRP=46.8017;SRR=1;TYPE=snp	GT:DP:RO:QR:AO:QA:GL	0/1:66:24:307:42:427:-10,0,-10
hsv1	126601	.	A	C	57.9262	.	AB=0.548387;ABP=4.27115;AC=1;AF=0.5;AN=2;AO=34;CIGAR=1X;DP=62;DPB=62;DPRA=0;EPP=39.7976;EPPR=11.3621;GTI=0;LEN=1;MEANALT=2;MQM=26.2059;MQMR=33.4615;NS=1;NUMALT=1;ODDS=13.338;PAIRED=1;PAIREDR=1;PAO=0;PQA=0;PQR=0;PRO=0;QA=333;QR=374;RO=26;RPP=39.7976;RPPR=11.3621;RUN=1;SAF=34;SAP=76.8404;SAR=0;SRF=26;SRP=59.4686;SRR=0;TYPE=snp	GT:DP:RO:QR:AO:QA:GL	0/1:62:26:374:34:333:-10,0,-10
hsv1	132763	.	G	A	682305	.	AB=0;ABP=0;AC=2;AF=1;AN=2;AO=20256;CIGAR=1X;DP=20289;DPB=20289;DPRA=0;EPP=113.67;EPPR=4.31318;GTI=0;LEN=1;MEANALT=3;MQM=59.9922;MQMR=60;NS=1;NUMALT=1;ODDS=27807.3;PAIRED=0.994767;PAIREDR=0.933333;PAO=0;PQA=0;PQR=0;PRO=0;QA=760185;QR=305;RO=15;RPP=374.682;RPPR=4.31318;RUN=1;SAF=11701;SAP=1064.02;SAR=8555;SRF=10;SRP=6.62942;SRR=5;TYPE=snp	GT:DP:RO:QR:AO:QA:GL	1/1:20289:15:305:20256:760185:-10,-10,0
hsv1	133062	.	A	G	23293.2	.	AB=0.290883;ABP=8327.41;AC=1;AF=0.5;AN=2;AO=6375;CIGAR=1X;DP=21916;DPB=21916;DPRA=0;EPP=434.111;EPPR=2244.82;GTI=0;LEN=1;MEANALT=3;MQM=59.0932;MQMR=59.9595;NS=1;NUMALT=1;ODDS=5363.46;PAIRED=0.996549;PAIREDR=0.994774;PAO=0;PQA=0;PQR=0;PRO=0;QA=67057;QR=557000;RO=15498;RPP=428.002;RPPR=137.026;RUN=1;SAF=6371;SAP=13811.4;SAR=4;SRF=3017;SRP=12552.6;SRR=12481;TYPE=snp	GT:DP:RO:QR:AO:QA:GL	0/1:21916:15498:557000:6375:67057:-10,0,-10
hsv1	138491	.	A	G	771512	.	AB=0;ABP=0;AC=2;AF=1;AN=2;AO=22420;CIGAR=1X;DP=22451;DPB=22451;DPRA=0;EPP=18.507;EPPR=6.20364;GTI=0;LEN=1;MEANALT=3;MQM=59.991;MQMR=60;NS=1;NUMALT=1;ODDS=30742.7;PAIRED=0.99215;PAIREDR=1;PAO=0;PQA=0;PQR=0;PRO=0;QA=858168;QR=475;RO=17;RPP=160.212;RPPR=3.13803;RUN=1;SAF=10495;SAP=201.068;SAR=11925;SRF=7;SRP=4.1599;SRR=10;TYPE=snp	GT:DP:RO:QR:AO:QA:GL	1/1:22451:17:475:22420:858168:-10,-10,0
hsv1	139357	.	G	A	737350	.	AB=0;ABP=0;AC=2;AF=1;AN=2;AO=22685;CIGAR=1X;DP=22761;DPB=22761;DPRA=0;EPP=301.208;EPPR=10.0459;GTI=0;LEN=1;MEANALT=3;MQM=59.9939;MQMR=59.16;NS=1;NUMALT=1;ODDS=31015.7;PAIRED=0.991713;PAIREDR=0.96;PAO=0;PQA=0;PQR=0;PRO=0;QA=820358;QR=466;RO=25;RPP=222.136;RPPR=3.09716;RUN=1;SAF=11538;SAP=17.6445;SAR=11147;SRF=6;SRP=17.6895;SRR=19;TYPE=snp	GT:DP:RO:QR:AO:QA:GL	1/1:22761:25:466:22685:820358:-10,-10,0
hsv1	141941	.	G	A	694220	.	AB=0;ABP=0;AC=2;AF=1;AN=2;AO=21290;CIGAR=1X;DP=21469;DPB=21469;DPRA=0;EPP=986.98;EPPR=7.5342;GTI=0;LEN=1;MEANALT=3;MQM=59.9776;MQMR=58.125;NS=1;NUMALT=1;ODDS=28661.2;PAIRED=0.991217;PAIREDR=0.416667;PAO=0;PQA=0;PQR=0;PRO=0;QA=774173;QR=1291;RO=48;RPP=7.42301;RPPR=21.1059;RUN=1;SAF=11633;SAP=401.257;SAR=9657;SRF=37;SRP=33.5919;SRR=11;TYPE=snp	GT:DP:RO:QR:AO:QA:GL	1/1:21469:48:1291:21290:774173:-10,-10,0
hsv1	141964	.	G	A	637706	.	AB=0;ABP=0;AC=2;AF=1;AN=2;AO=21243;CIGAR=1X;DP=21399;DPB=21399;DPRA=0;EPP=3.07419;EPPR=23.691;GTI=0;LEN=1;MEANALT=3;MQM=59.9654;MQMR=60;NS=1;NUMALT=1;ODDS=28686.8;PAIRED=0.992421;PAIREDR=0.5;PAO=0;PQA=0;PQR=0;PRO=0;QA=712422;QR=1172;RO=42;RPP=47.9433;RPPR=8.18047;RUN=1;SAF=13030;SAP=2374.89;SAR=8213;SRF=33;SRP=32.7905;SRR=9;TYPE=snp	GT:DP:RO:QR:AO:QA:GL	1/1:21399:42:1172:21243:712422:-10,-10,0
hsv1	143595	.	T	C	508303	.	AB=0;ABP=0;AC=2;AF=1;AN=2;AO=16298;CIGAR=1X;DP=16338;DPB=16338;DPRA=0;EPP=41.0032;EPPR=3.68421;GTI=0;LEN=1;MEANALT=3;MQM=59.9851;MQMR=59.7931;NS=1;NUMALT=1;ODDS=22087.8;PAIRED=0.956375;PAIREDR=0.931034;PAO=0;PQA=0;PQR=0;PRO=0;QA=571281;QR=684;RO=29;RPP=3.24533;RPPR=3.68421;RUN=1;SAF=5070;SAP=5055.43;SAR=11228;SRF=6;SRP=24.6501;SRR=23;TYPE=snp	GT:DP:RO:QR:AO:QA:GL	1/1:16338:29:684:16298:571281:-10,-10,0
hsv1	145819	.	A	G	3448.86	.	AB=0;ABP=0;AC=2;AF=1;AN=2;AO=778;CIGAR=1X;DP=884;DPB=884;DPRA=0;EPP=1449.91;EPPR=15.8176;GTI=0;LEN=1;MEANALT=2;MQM=34.6799;MQMR=20.2041;NS=1;NUMALT=1;ODDS=698.908;PAIRED=1;PAIREDR=1;PAO=0;PQA=0;PQR=0;PRO=0;QA=10882;QR=496;RO=49;RPP=1449.91;RPPR=15.8176;RUN=1;SAF=0;SAP=1692.42;SAR=778;SRF=35;SRP=22.5536;SRR=14;TYPE=snp	GT:DP:RO:QR:AO:QA:GL	1/1:884:49:496:778:10882:-10,-10,0
